# Supplementary material
Source: MDPI journal article supplement (https://www.mdpi.com/2073-4395/7/1/15)
Supplement: s1 [file s1]

## Sheet: Feuil1
Supplemental Data Set 1: Heat map of metabolite changes during primary leaf senescence in barley seedlings grown under LN and HN conditions.
Values for each metabolite were first measured as peak area normalized according to Ribitol internal standard and to mg FW (see Supplementary data Set 1).
HN represent leaves of plants grown under high nitrate and LN leaves from plants grown under low nitrate.
Log2 Fold changes from L3 were calculated independently for LN and HN leaves on the mean of six biological repeats.
Values go from low (blue) to high (red) metabolite content compared to the youngest leaf (L3)
										p values of ratio to L3
							-3	3		T-tests: signigicant in orange
			Log2 Fold changes							p<0.05
		Nutrition mM	Low Nitrate (0.5 mM)			High Nitrate (5 mM)				LN	LN	HN	HN
		Leaf Rank	LNL1	LNL2	LNL3	HNL1	HNL2	HNL3		L1/L3	L2/L3	L1/L3	L2/L3
Class 1	Decreased in OLD leaves	a-Aminoadipate	-4.46998			-0.0311094	-1.08487		AMINE	0.000331486	0.908907	3.35062e-06	7.32936e-06
		Glucose	-3.59686	-5.93906		-3.78852	-2.24748		SUG	0.0427084	0.0323283	0.0305689	0.039332
		Asparagine	-2.25754				-0.624317		AA	0.0153553	0.209766	0.0513265	0.0407923
		Threonine	-1.81623	-0.907586		-1.1693	-0.525835		AA	0.00409646	0.000130184	0.00311101	0.000292679
		Shikimate	-1.5497	-0.917609		-0.392053	0.184574		OA	0.108891	0.058347	0.042694	0.0113658
		Aspartate	-1.15762	-0.575218		-0.987512	-0.390709		AA	0.0354693	0.00138387	0.271485	0.0622788
		Nicotinate	-1.15007	0.140096			-0.711817		SUGAR-P	0.0161483	0.0163599	0.191721	5.78971e-05				w
		Valine	-1.0844	-0.624878		-0.838906	-0.900233		AA	5.8758e-05	6.16773e-05	0.0223026	0.00214488
		Phytol	-1.06791	-0.517739		-0.215277	0.369068		OTHER	0.0133757	0.0299531	0.000398012	4.41094e-06
		Threonate-lactone	-0.944695	-0.754043		-1.08705	-0.490766		ACID SUGAR	0.00260867	2.03454e-05	2.04023e-05	2.28757e-06
		Dehydroascorbate	-0.934055	-0.369853		-0.930562	-0.391985		REDOX	0.00346165	2.26432e-05	0.00788042	0.000122543
		Glutamine	-0.924497	-0.956597					AA	0.0105644	0.00322368	0.167623	0.196971
		Arginine	-0.878373	-0.7413		-0.430548	-0.385216		AA	0.0297224	0.000397496	0.0198817	0.00541505
		Methionine	-0.71406	-0.203149					AA	0.0187961	0.00661734	0.485101	0.0507453
		Ascorbate	-0.480855	-0.194357					REDOX	0.000148536	5.65654e-05	0.668396	0.316002
		b-Alanine	-0.15536	-0.366822					AA	0.703655	0.00296283	0.238378	0.485732
		Rafinose	-0.104506			-0.0402271			SUG	0.0314529	0.83079	0.0021565	0.803627
		Fructose	0.0491508	-1.07199		-1.13192			SUG	0.0274524	0.00237284	0.0152691	0.855889
		Ribose-5-P		-1.64884		-0.682046	0.1221		SUGAR-P	0.578752	0.00162765	1.45829e-05	1.6128e-07
		Proline		-1.249					AA	0.0641799	0.012815	0.32487	0.414998
		Pipecolate				-0.57331	-0.46365		AMINE	0.264487	0.183213	1.30127e-06	4.27691e-06
		Quinate		-1.41611		-1.16153	-0.216836		OA	0.326293	0.000941541	0.0163597	0.00457857
		Linolenic acid		-0.861655		-0.655165	-0.207395		FA	0.461366	0.0454387	0.0247071	0.0146237
		Kestose-1		-0.687396		-2.71696	-0.34087		SUG	0.483141	5.96358e-06	0.00587149	2.88657e-05
		Serine		-0.564097		-0.936434	-0.213152		AA	0.137377	8.30189e-05	0.298846	0.0232551
		Glucose-6-P		-0.402242			-0.00175463		SUGAR-P	0.994499	0.00679745	0.0705354	6.61837e-05
		Glutamate		-0.387029			-0.0448472		AA	0.692358	0.00416219	0.0865015	0.00461377
		Glycerate-3-P		-0.326295			-0.658564		SUGAR-P	0.11098	0.0485384	0.511328	0.00733901
		myo-Inositol-P				-0.439205	-0.207398		SUGAR-P	0.623016	0.202836	0.00944196	0.000338208
		myo-Inositol		-0.0353054			-0.235922		ALCOOL SUG	0.0661024	0.0114862	0.789239	0.137005
Class 2	Increased in OLD leaves	Isomaltose	3.0734	2.04799		2.21212	1.64271		SUG	0.00926993	0.0259676	0.00012468	0.000771492
		Erythronate	2.42772	1.32499		1.09626	0.7274		OA	0.0124128	0.000297186	0.00127086	2.74385e-06
		a-Tocopherol	2.09439	1.45709		1.76863	1.0117		REDOX	0.00102416	1.85336e-08	5.26277e-05	2.2523e-05
		Rhamnose	1.71329	1.40561		1.31616	0.950398		SUG	0.00075579	4.51137e-06	5.48492e-05	1.42188e-08
		Threonate	1.35096			0.168081	0.236537		OA	0.00628114	0.0977941	0.00857716	2.2575e-06
		Serotonin	0.84577	2.06336		1.9459			OTHER	0.00017994	7.11317e-06	0.000206345	0.0681817
		Glycerate	0.591134				0.321913		OA	0.0103562	0.597885	0.0770523	0.000753803
		Aconitate	0.583317	0.673465		0.915185	0.743113		OA	0.00325618	0.000155546	0.000986399	0.0496123
		Maltose	0.575226	0.761705					SUG	0.00109767	0.0258917	0.110615	0.33331
		Malate	0.292915	-0.0688347			0.772781		OA	0.000377256	1.10166e-05	0.412094	0.0723294
		Digalactosylglycerol	0.182063	0.537217		2.24439			SUG	0.00221987	3.30955e-09	0.000400646	0.165976
		Stigmasterol	0.0915892	0.364946		0.444899			STEROL	5.33564e-06	0.000176745	0.00140213	0.384346
		Citrate	-0.0984392	0.358711		1.02526			OA	0.00147222	0.000208198	0.0097389	0.479817
		Galactinol	-0.143208	0.947604		1.31548			ALCOOL SUG	0.0080389	0.000723256	0.000567664	0.688376
		Laurate		1.62037		1.11232	0.453323		FA	0.0710636	0.0126438	0.0025815	0.00152243
		Melibiose				1.338			SUG	0.521993	0.0890917	0.00990093	0.0602429
	*	Cystein		0.916539		0.659077	0.468298		SUG	0.0807466	0.014374	0.00335839	0.00153336
		Linoleic acid				0.212222	0.135652		FA	0.526307	0.351686	0.000820887	1.45806e-05
		Salicylate				0.284266			OTHER	0.296769	0.427824	0.00391786	0.254409
		Spermidine				0.26414	0.487335		AMINE	0.0807809	0.0584064	0.0049061	0.0421698
		Succinate				0.356954	0.41621		OA	0.225665	0.290091	5.69612e-06	0.000228983
		Galactonate				0.382784			OA	0.205109	0.168683	0.0413767	0.160936
		Arabitol		0.417999		1.05347	0.370446		ALCOOL SUG	0.219132	0.000532701	0.00344436	1.41688e-05
		Sinapinate-trans		0.387292					OA	0.688169	0.0326578	0.100495	0.0590265
	*	Leucine		0.797604					AA	0.0710947	0.0258893	0.0701169	0.130957
		Galactosylglycerol				0.452811			SUG	0.745807	0.0990771	0.0336476	0.619583
		Fumarate					0.119857		OA	0.381865	0.727983	0.14561	0.0112048
	*	Phenylalanine					0.278372		AA	0.113467	0.284338	0.112269	0.000887095
		Glycerol				0.200342			ALCOOL SUG	0.146259	0.258155	0.00151713	0.103147
		Gluconate				0.725002			OA	0.598821	0.165534	0.0156104	0.446868
		Melezitose				0.785121	0.349386		SUG	0.0960095	0.0960095	0.0312406	0.00217896
	*	Histidine				0.555836	0.0249608		AA	0.908204	0.0539934	0.0446684	0.04
		Tyrosine				0.239925	0.315787		AA	0.125963	0.185283	0.0255479	0.00798404
Class 3	OPPOSITE	Putrescine	0.523371	-1.17347		-1.11882			AMINE	0.000363882	3.03718e-05	0.00286873	0.407218
	Increased in OLD leaves at LN	Phosphate	0.26188	0.705488		-1.10794			INORG	0.0349588	0.00198581	0.00814455	0.228236
	Decreased in OLD leaves at HN	Sucrose-6-P				-0.512776			SUGAR-P	0.921854	0.151611	0.000963485	0.643712
Class 4	OPPOSITE *	Tryptophan		-1.7259			0.851955		AA	0.00125096	0.000556659	0.058387	0.0370291
	Increased in OLD leaves at HN	Malonate		-0.466577			0.405361		OA	0.0663622	0.000244082	0.0627333	0.0163139
	Decreased in OLD leaves at LN	Maleate	-0.283522	-0.693033		2.36918			OA	0.00244441	6.1526e-05	0.0120914	0.256591
	*	Lysine	-0.0569711	-0.192475			0.619534		AA	0.0101927	0.00117144	0.501568	0.825451
		Monopalmitine	-0.0891231	-0.174154			0.720412		OA	0.0135561	0.00624863	0.448892	0.673285
