# Supplementary material
Source: MDPI journal article supplement (https://www.mdpi.com/2073-4395/7/1/15)
Supplement: s2 [file s2]

## Sheet: Feuil1
	Supplemental Data Set 2: Heat map of metabolite changes in flag leaf during senescence.
	Log2 Fold changes from harvesting time T1 (young flag leaf) are shown.
	Data represent the mean value of four biological repeats.
	Samples represent flag leaves harvested at three different stages of senescence. T1 (young leaves), T3 (mature leaves) and T5 (senescecing leaves)
	Values go from low (blue) to high (red) metabolite content compared to the youngest leaves (T1)
	Only data significantly different from T1 are shown (P<0.05, T-test)					-3	3
		Log2 Fold change	Young	mature	Old
	Class	Name	T1	T3	T5
Class 1	DOWN during senescence	Homoserine	0	-2.57173	-3.98619
		Aspartate	0	-0.749544	-2.48728
		Glutamate	0	-0.856354	-2.17324
		Sucrose	0	-1.31339	-1.86446
		Alanine	0	-1.30885	-1.75907
		Threonine	0	-1.05383	-1.74684
		Fructose-6-P	0	-0.986224	-1.74445
		Glucose-6-P	0	-1.23927	-1.66496
		Glycerate	0	-0.202745	-1.65009
		Serine	0	-1.01787	-1.54294
		myo-Inositol-1-P	0	-0.56489	-1.44791
		Sucrose-6-P	0	-1.51927	-1.29959
		Glycerol-3-P	0	-0.571115	-1.28578
		Proline	0	-0.940376	-0.872735
		Valine	0	-0.667116	-0.836317
		Galactinol	0	0.0452464	-0.774862
		Glycine	0	-0.00617529	-0.570998
		myo-Inositol	0	-0.0527475	-0.542099
		Threonate-lactone	0	-0.155764	-0.490348
		GABA	0	-0.710696	-0.459107
		Glucose	0	-0.246561	-0.445554
		Glycolate	0	-0.39769	-0.355424
		Shikimate	0	0.0841574	-0.232135
	High in young leaves (T1)	Dehydroascorbate	0	-0.193476	-0.18865
		Tyrosine	0	-0.427113	-0.188445
	UP during senescence	Threitol	0	0.358705	1.02279
	High in senescing leaves (T5)	alpha-Aminoadipate	0	0	18.8143
		Mannitol	0	0.812392	1.98808
		Arabitol	0	0.691069	1.86706
		Gluconate	0	1.57777	1.69459
		Pipecolate	0	0.560867	1.67006
		Trehalose	0	1.46106	1.44511
		Maltose	0	0.94553	1.32409
		Glycerol	0	-0.0800315	0.864749
		Erythritol	0	0.179025	0.863831
		beta-Alanine	0	0.114513	0.844703
		Ribose	0	-0.0684225	0.823278
		Cellobiose	0	0.0454574	0.802248
		Sorbitol	0	0.185386	0.528027
		Xylose	0	0.0179501	0.513034
		Gentiobiose	0	0.0333162	0.475517
		Isomaltose	0	0.209491	0.432522
Class 3	Low in mature leaves (T3)	Lysine	0	-0.201321	0.849596
		gamma-Tocopherol	0	-0.245296	2.06722
		Tryptophan	0	-0.326175	0.97486
		Methionine	0	-0.358663	0.964981
		Urea	0	-1.64167	0.692436
		Leucine	0	-0.605462	0.220163
		Isoleucine	0	-0.703144	0.119043
		Glutamine	0	-0.642554	-0.0318919
		Phenylalanine	0	-0.469168	-0.0684922
		Arginine	0	-0.715478	-0.270189
		Asparagine	0	-1.305	-0.404878
Class 4	High in mature leaves (T3)	2-Oxoglutarate	0	0.212477	-1.0681
		Ascorbate	0	1.85206	0.387351
